# Supplementary material for: Colistin Induces Resistance through Biofilm Formation, via Increased phoQ Expression, in Avian Pathogenic Escherichia coli
Source: MDPI journal article supplement (doi:10.3390/pathogens10111525), 2021-11-22
Supplement: s1 [file s1]

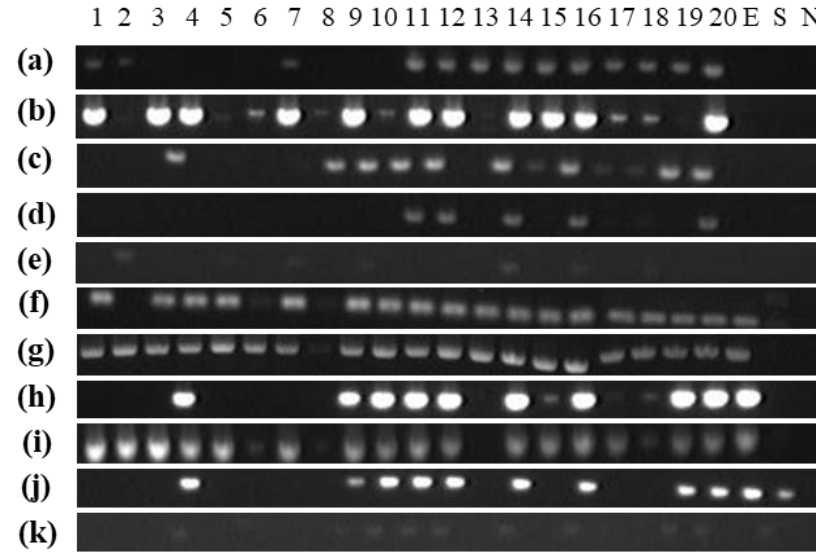

**Figure S1.** Identification of avian pathogenic *Escherichia coli* (APEC) strains by PCR. Lane (a) shows the expression of *fimA*<sub>MT78</sub>, (b) is *tsh*, (c) is *felA*, (d) is *fimH*, (e) is *sta*, (f) is *yaiO*, (g) is *fimA*, (h) is *papC*, (i) is *iutA*, (j) is *papG*<sub>IA2</sub>, and (k) is *papG*<sub>J96</sub>. Primer information is in Table S1. Horizontal numbers (1–20) mean each APEC strain, E means *E. coli* ATCC 25922, and S means *Salmonella enterica* subsp. *enterica* serovar Typhimurium ATCC 14028 and N means Negative control.

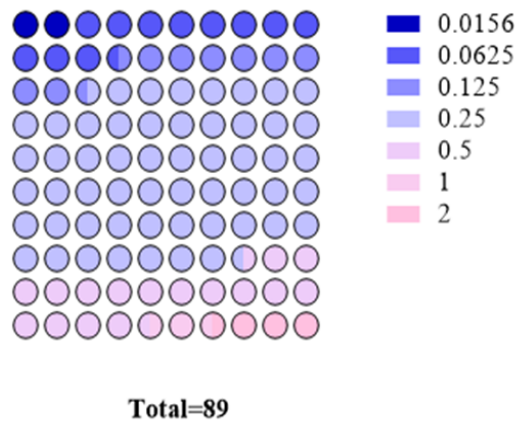

**a**

**MIC distribution of isolated strains**

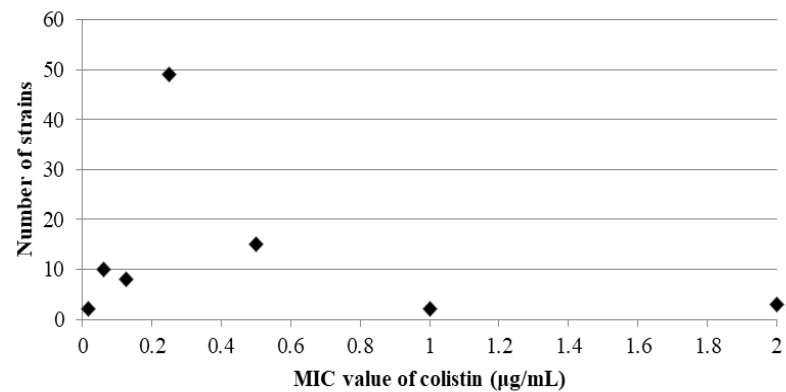

**b**

**Figure S2.** MIC distribution of isolated APECs. MICs of 89 APECs were confirmed less than 2 μg/mL, that means colistin susceptible [49] (a). 49 APECs has 0.25 μg/mL MIC value, and it was determined MIC<sub>50</sub> (b).

**Table S1.** Primer information.

| Primer *                      | Primer Sequence            | Size | Tm (°C) | Accession Number | Reference |
|-------------------------------|----------------------------|------|---------|------------------|-----------|
| APEC_fimAv <sub>MT78</sub> _F | tctggctgatactacacc         | 266  | 52      | Z37500           | [38]      |
| APEC_fimAv <sub>MT78</sub> _R | actttaggatgagtactg         |      |         |                  |           |
| APEC_tsh_F                    | gggtggtgcactggagtg         | 640  | 58      | L27423           | [39]      |
| APEC_tsh_R                    | agtccagcgtgatagtgg         |      |         |                  |           |
| APEC_felA_F                   | ggtaascagctaaaaacggtaagg   | 239  | 61      | GCA_001620375.1  | [40]      |
| APEC_felA_R                   | ccttcagaaacagtaccgccattcg  |      |         |                  |           |
| APEC_fim H_F                  | gatctttcgacgcaaatc         | 389  | 52      | AJ225176.1       | [41]      |
| APEC_fim H_R                  | cgagcagaacatcgacg          |      |         |                  |           |
| APEC_sta_F                    | ttaatagcaccgggtacaagcagg   | 147  | 55      | GPL3935          | [32]      |
| APEC_sta_R                    | cttgactcttcaaaagagaaaattac |      |         |                  |           |
| <i>E. coli</i> _yaiO_F        | tgatttcgctgctctgaatg       | 115  | 58      | EG13297          | [42]      |
| <i>E. coli</i> _yaiO_R        | atgctgccgtagcgtgtttc       |      |         |                  |           |
| APEC_fimA_F                   | cggctctgtccctsagt          | 500  | 52      | AF490890         | [43]      |
| APEC_fimA_R                   | gtcgcacccgcattagc          |      |         |                  |           |
| APEC_papC_F                   | gacggctgtactgcagggtgtggcg  | 328  | 61      | DQ010312.1       | [44]      |
| APEC_papC_R                   | atatcctttctgcagggatgcaata  |      |         |                  |           |
| APEC_iutA_F                   | atgagcatatctccggacg        | 587  | 58      | GCA_001021615.1  | [33]      |
| APEC_iutA_R                   | caggtcgaagaacatctgg        |      |         |                  |           |
| APEC_papGIA2_F                | gggatgagcgggcctttgat       | 190  | 63      |                  | [45]      |
| APEC_papGIA2_R                | cgggcccccaagtaactcg        |      |         |                  |           |
| APEC_papGJ96_F                | tcgtgctcaggtccggaattt      | 461  | 63      |                  | [46]      |
| APEC_papGJ96_R                | tggcatccccaacattatcg       |      |         |                  |           |

\* The primers are designed to target the following adhesins: type 1 pili (*fim*), F11 fimbriae (*felA*), aerobactin presence (*iutA*), pili associated with pyelonephritis (*pap*), heat stable enterotoxins (*sta*), temperature-sensitive hemagglutinin (*tsh*).

**Table S2.** Primers used in qRT-PCR gene expression.

| Target gene  | Sequence (5'–3')                                                              |
|--------------|-------------------------------------------------------------------------------|
| <i>pmrA</i>  | F: acggtctgccttatgccatc<br>R: tagcagataaatagcgtcagg                           |
| <i>pmrB</i>  | F: atatccataacctgcgcgac<br>R: gatgatattgaccacgagatt                           |
| <i>mgrB</i>  | F: ttcacacgcctgaatttac<br>R: cgactcattccgaaaagca                              |
| <i>phoP</i>  | F: gggtaactcgacatgcaact<br>R: ttacactttacctcccctcc                            |
| <i>phoQ</i>  | F: aaagccgcgttttaacacca<br>R: atgtactgatgggacgtctg                            |
| <i>mcr-1</i> | F: cggaattccaagatacaaaattataaatactct<br>R: acgcgtcgactcagcggatgaatgcggcgcggtc |

**Table S3.** In vitro pharmacodynamic profile of isolates

|         | APEC 1    | APEC 2    | APEC 3    | APEC 4    | APEC 5    | APEC 6    | APEC 7    | APEC 8    | APEC 9    | APEC 10   |
|---------|-----------|-----------|-----------|-----------|-----------|-----------|-----------|-----------|-----------|-----------|
| MIC     | 0.03–0.06 | 0.06–0.13 | 0.016     | 0.06–0.13 | 0.06      | 0.25      | 0.02–0.06 | 0.25–0.50 | 0.03–0.06 | 0.06–0.25 |
| MBC     | 0.03–0.06 | 0.06–0.13 | 0.016     | 0.06–0.13 | 0.06      | 0.25      | 0.02–0.06 | 0.25–0.50 | 0.03–0.06 | 0.06–0.25 |
| MBC/MIC | 1         | 1         | 1         | 1         | 1         | 1         | 1         | 1         | 1         | 1         |
|         | APEC 11   | APEC 12   | APEC 13   | APEC 14   | APEC 15   | APEC 16   | APEC 17   | APEC 18   | APEC 19   | APEC 20   |
| MIC     | 0.06–0.13 | 0.0625    | 0.03–0.06 | 0.03–0.06 | 0.03–0.06 | 0.06–0.13 | 0.03–0.06 | 0.25      | 0.0156    | 0.06–0.13 |
| MBC     | 0.06–0.13 | 0.0625    | 0.03–0.06 | 0.0625    | 0.03–0.06 | 0.06–0.13 | 0.0625    | 0.25      | 0.0156    | 0.125     |
| MBC/MIC | 1         | 1         | 1         | 1         | 1         | 1         | 1         | 1         | 1         | 1         |
|         | APEC 21   | APEC 22   | APEC 23   | APEC 24   | APEC 25   | APEC 26   | APEC 27   | APEC 28   | APEC 29   | APEC 30   |
| MIC     | 0.13      | 0.25      | 0.25      | 0.25      | 0.50      | 0.25      | 2.00      | 0.25      | 0.25      | 0.25      |
| MBC     | 0.13      | 0.25      | 0.25      | 0.50      | 1.00      | 0.25      | 2.00      | 0.25      | 0.25      | 0.25      |
| MBC/MIC | 1         | 1         | 1         | 2         | 2         | 1         | 1         | 1         | 1         | 1         |
|         | APEC 31   | APEC 32   | APEC 33   | APEC 34   | APEC 35   | APEC 36   | APEC 37   | APEC 38   | APEC 39   | APEC 40   |
| MIC     | 0.25      | 0.25      | 0.50      | 0.25      | 0.25      | 0.25–1.00 | 0.25      | 0.25      | 0.25      | 0.25      |
| MBC     | 0.25      | 0.25      | 0.50      | 0.25      | 0.25      | 2         | 0.25      | 0.25      | 0.25      | 0.25      |
| MBC/MIC | 1         | 1         | 1         | 1         | 1         | 2         | 1         | 1         | 1         | 1         |
|         | APEC 41   | APEC 42   | APEC 43   | APEC 44   | APEC 45   | APEC 46   | APEC 47   | APEC 48   | APEC 49   | APEC 50   |
| MIC     | 0.25      | 0.25      | 0.25      | 0.25      | 0.25      | 0.25      | 0.13      | 0.50      | 0.50      | 0.25      |

|         |                |                |                |                |                |                |                |                |                |                |
|---------|----------------|----------------|----------------|----------------|----------------|----------------|----------------|----------------|----------------|----------------|
| MBC     | 0.25           | 0.25           | 0.25           | 0.25           | 0.25           | 0.25           | 0.13           | 0.50           | 0.50           | 0.25           |
| MBC/MIC | 1              | 1              | 1              | 1              | 1              | 1              | 1              | 1              | 1              | 1              |
|         | <b>APEC 51</b> | <b>APEC 52</b> | <b>APEC 53</b> | <b>APEC 54</b> | <b>APEC 55</b> | <b>APEC 56</b> | <b>APEC 57</b> | <b>APEC 58</b> | <b>APEC 59</b> | <b>APEC 60</b> |
| MIC     | 0.25           | 0.13           | 0.25           | 0.25–0.50      | 0.13           | 0.25           | 0.25           | 0.25           | 0.25           | 0.25           |
| MBC     | 0.25           | 0.13           | 0.25           | 0.50           | 0.13           | 0.25           | 0.25           | 0.25           | 0.25           | 0.25           |
| MBC/MIC | 1              | 1              | 1              | 1              | 1              | 1              | 1              | 1              | 1              | 1              |
|         | <b>APEC 61</b> | <b>APEC 62</b> | <b>APEC 63</b> | <b>APEC 64</b> | <b>APEC 65</b> | <b>APEC 66</b> | <b>APEC 67</b> | <b>APEC 68</b> | <b>APEC 69</b> | <b>APEC 70</b> |
| MIC     | 0.50           | 0.25           | 0.25–1.00      | 0.25           | 0.13–0.25      | 0.25           | 0.13–0.50      | 0.25–0.50      | 0.25           | 0.50           |
| MBC     | 0.50           | 0.25           | 0.25–1.00      | 0.25           | 0.13–0.25      | 0.25           | 0.13–0.50      | 0.25–0.50      | 0.25           | 0.50           |
| MBC/MIC | 1              | 1              | 1              | 1              | 1              | 1              | 1              | 1              | 1              | 1              |
|         | <b>APEC 71</b> | <b>APEC 72</b> | <b>APEC 73</b> | <b>APEC 74</b> | <b>APEC 75</b> | <b>APEC 76</b> | <b>APEC 77</b> | <b>APEC 78</b> | <b>APEC 79</b> | <b>APEC 80</b> |
| MIC     | 0.50           | 0.25           | 0.13–0.25      | 0.25           | 0.25           | 0.25           | 0.25–0.50      | 0.50–2.00      | 0.13–0.25      | 0.50           |
| MBC     | 0.50           | 0.25           | 0.13–0.25      | 0.25           | 0.25           | 0.25           | 0.25–0.50      | 0.50–2.00      | 0.13–0.25      | 0.50           |
| MBC/MIC | 1              | 1              | 1              | 1              | 1              | 1              | 1              | 1              | 1              | 1              |
|         | <b>APEC 81</b> | <b>APEC 82</b> | <b>APEC 83</b> | <b>APEC 84</b> | <b>APEC 85</b> | <b>APEC 86</b> | <b>APEC 87</b> | <b>APEC 88</b> | <b>APEC 89</b> |                |
| MIC     | 0.50–2.00      | 0.13–0.25      | 0.25–0.50      | 0.25           | 0.13–0.25      | 0.25           | 0.25           | 0.25–0.50      | 0.25           |                |
| MBC     | 0.50–2.00      | 0.13–0.25      | 0.25–0.50      | 0.25           | 0.25           | 0.25           | 0.25           | 0.25–0.50      | 0.25           |                |
| MBC/MIC | 1              | 1              | 1              | 1              | 2              | 1              | 1              | 1              | 1              |                |
